# Supplementary material
Source: PubMed Central journal article supplement (PMC4329482)
Supplement: tableS1.pdf [file tableS1.pdf]

**Supplementary Table 1.** Plasma proteomic profiling in LC young, LC aging, and PUFA aging mice at baseline (d0 control), at d1 and d5 post-MI

|                                                        | day 0 controls |           |            | Post-MI day 1 |           |            | Post-MI day 5 |           |            |
|--------------------------------------------------------|----------------|-----------|------------|---------------|-----------|------------|---------------|-----------|------------|
|                                                        | LC young       | LC aging  | PUFA aging | LC young      | LC aging  | PUFA aging | LC young      | LC aging  | PUFA aging |
| Apolipoprotein A-I<br>μg/ml                            | 49±15          | 154±6*¥   | 151±16*¥   | 70±15*        | 117±8*    | 133±4*¥    | 150±11*       | 191±14*   | 206±26*    |
| C-reactive protein<br>μg/ml                            | 4.1±0.5        | 4.8±0.4   | 4.1±1.3    | 8.7±0.3*      | 8.0±1.0*  | 7.7±0.3*   | 7.0±0.5*      | 4.8±0.5   | 3.8±0.4¥   |
| CD40 pg/ml                                             | 25±2           | 20±1      | 23±1       | 33±1          | 26±6*     | 46±6*¥     | 28±2          | 41±9*¥    | 48±6*¥     |
| CD40 Ligand pg/ml                                      | 2250±150       | 1119±236* | 1626±566*  | 3613±806      | 1493±374  | 1203±88    | 1444±175*     | 2807±755* | 2787±211*  |
| Eotaxin pg/ml                                          | 855±55         | 997±76    | 1675±355*  | 1289±165*     | 1317±232* | 1515±195   | 857±65        | 1138±137* | 1373±200*  |
| Factor VII ng/ml                                       | 30±1           | 33.5±4.5  | 32.0±3.4   | 37±4          | 29.0±3.0  | 39.5±13.5  | 52.2±1.0*     | 36.5±2.1* | 45.5±8.0*  |
| Fibrinogen mg/ml                                       | 70±1           | 64±4      | 71±9       | 128±1*        | 171±10*   | 208±20*¥   | 102±6*        | 109±14*   | 124±8*     |
| Granulocyte<br>Chemotactic<br>Protein-2 Mouse<br>ng/ml | 4.2±0.23       | 3.2±0.05* | 5.1±0.63   | 5.4±0.3       | 2.3±0.63* | 3.4±1.23*  | 4.2±0.3       | 7.1±3.0   | 3.7±1.01*¥ |
| Growth Hormone<br>ng/ml                                | 6.4±1.5        | 7.7±2.0   | 12.2±3.7*  | 18±3.2*       | 16.0±5.0* | 21.7±3.3*¥ | 23.2±4.0*     | 30.4±6.0* | 47.1±9.5*¥ |
| Growth-Regulated<br>Alpha Protein ng/ml                | 0.04±0.01      | 0.12±0.1* | 0.041±0.1* | 0.2±0.1       | 0.03±0.1  | 0.10±0.2   | 0.1±0.1       | 0.10±0.2  | 0.06±0.1   |
| Haptoglobin μg/ml                                      | 90±13          | 87±24     | 87±22      | 178±8*        | 193±8*    | 180±7*     | 130±12*       | 120±9*    | 149±15*    |
| Immunoglobulin A                                       | 60±13          | 67±26     | 59±6       | 86±18         | 74±16     | 70±6       | 108±22*       | 82±16     | 85±14      |

|                                              |         |         |           |           |           |           |          |          |          |
|----------------------------------------------|---------|---------|-----------|-----------|-----------|-----------|----------|----------|----------|
| µg/ml                                        |         |         |           |           |           |           |          |          |          |
| Interferon gamma Induced Protein 10 pg/ml    | 55±14   | 84±1    | 147±6*¥   | 74±34*    | 45±12*    | 51±3*     | 96±20*   | 92±17*   | 136±41*¥ |
| Interleukin-1 alpha pg/ml                    | 170±30  | N.D.    | N.D.      | 208±20*   | N.D.      | 126±19    | 116±14*  | 158±30*  | 95±5*¥   |
| Interleukin-6 pg/ml                          | 13±6    | N.D.    | N.D.      | 44±1*     | 19.7±6.0* | 34.5±3.2* | 34±8*    | 40.1±10* | 22.1±7*  |
| Interleukin-18 ng/ml                         | 9±3     | 19±1*   | 22±1*¥    | 16±2*     | 21±2*     | 20±1*     | 24±2*    | 26±1*    | 22±1     |
| Leptin ng/ml                                 | 1.7±0.4 | 2.0±0.7 | 2.0±0.5   | 1.4±0.2   | 1.5±0.3   | 2.5±0.7¥  | 1.8±0.6  | 2.0±0.8  | 2.4±0.8  |
| Leukemia Inhibitory Factor pg/ml             | 980±54  | 634±15  | 814±79    | 1193±107* | 699±140   | 665±59    | 1088±86* | 735±97   | 748±79   |
| Lymphotactin pg/ml                           | 79±7    | 60±6    | 126±5*¥   | 76±12     | 51±5      | 53±5*     | 91±16    | 50±5     | 101±22¥  |
| Macrophage Colony-Stimulating Factor-1 ng/ml | 4.9±0.1 | 4.8±1.0 | 5.6±0.7   | 5.1±0.1   | 4.6±0.3   | 4.5±0.2   | 5.2±0.1  | 5.4±0.1  | 6.8±0.2  |
| Macrophage-Derived Chemokine pg/ml           | 1570±99 | 1290±70 | 1703±294* | 1924±134* | 1590±308  | 1590±149  | 1596±101 | 1015±104 | 1269±159 |
| Macrophage Inflammatory Protein-1alpha ng/ml | 4.0±0.3 | 5.2±0.7 | 5.0±0.4   | 6.1±1.0   | 6.3±0.1   | 6.5±0.3   | 7.2±0.4* | 5.5±0.3  | 5.8±0.3¥ |
| Macrophage                                   | 90±7    | N.D.    | N.D.      | 140±14    | N.D.      | 199±174   | 84±13    | 119±24   | 207±119¥ |

|                                               |         |         |           |          |          |           |          |          |          |
|-----------------------------------------------|---------|---------|-----------|----------|----------|-----------|----------|----------|----------|
| Inflammatory Protein-1 beta pg/ml             |         |         |           |          |          |           |          |          |          |
| Macrophage Inflammatory Protein-1 gamma ng/ml | 17±1    | 23±2    | 28±4*     | 24±2*    | 33±2*    | 50±3*¥    | 22±2*    | 33±4*    | 31±2*¥   |
| Macrophage Inflammatory Protein-3 beta ng/ml  | 2.0±0.4 | 2.1±0.1 | 3.5±0.3*¥ | 2.2±0.2  | 2.4±0.3  | 2.4±0.1   | 3.1±0.1* | 2.4±0.2  | 2.5±0.1  |
| Matrix Metalloproteinase-9 ng/ml              | 84±6    | 106±4   | 138±14*¥  | 128±9*   | 113±9    | 126±9     | 94±7     | 132±13*  | 148±15*¥ |
| Monocyte Chemotactic Protein 3 pg/ml          | 191±15  | 184±8   | 220±32*¥  | 502±50*  | 252±41*  | 328±16*¥  | 244±32*  | 254±65*  | 301±37*  |
| Monocyte Chemotactic Protein-5 pg/ml          | 16±1    | 13±1    | 28±14*¥   | 36±4*    | 29±6*    | 39±8*     | 25±3     | 21±7     | 21±2     |
| Myeloperoxidase ng/ml                         | 70±3    | 102±1   | 86±2      | 181±10*  | 175±12*  | 181±21*   | 122±13*  | 119±9*   | 155±15*¥ |
| Myoglobin ng/ml                               | 126±25  | 75±5*   | 43±13*¥   | 112±10   | 48±6*    | 184±80*   | 154±42*  | 103±35*  | 71±29*¥  |
| Plasminogen                                   | 0.3±0.2 | 0.5±0.5 | 0.4±0.4   | 1.2±1.0* | 1.5±1.5* | 3.0±3.0*¥ | 3.5±2.0* | 6.0±6.0* | 3.3±3.3* |

|                                                            |         |          |                |          |          |           |          |          |                |
|------------------------------------------------------------|---------|----------|----------------|----------|----------|-----------|----------|----------|----------------|
| Activator Inhibitor 1<br>ng/ml                             |         |          |                |          |          |           |          |          |                |
| Stem Cell Factor<br>pg/ml                                  | 375±25  | 520±55*  | 592±94*¥       | 435±56*  | 454±50*  | 793±73¥   | 315±21   | 521±55*  | 479±29         |
| Tissue Inhibitor of<br>Metalloproteinases<br>1 Mouse ng/ml | 1.2±0.2 | 0.65±0.1 | 1.3±0.2*¥      | 5.2±0.4* | 3.0±0.3  | 5.6±0.7¥  | 4.3±1.0* | 3.8±0.3* | 3.5±0.4*       |
| Vascular Cell<br>Adhesion Molecule-<br>1 ng/ml             | 1040±29 | 1410±137 | 2467±508*<br>¥ | 426±50*  | 1210±68* | 1578±55*¥ | 816±5*   | 1446±192 | 1697±137*<br>¥ |
| Vascular<br>Endothelial Growth<br>Factor A pg/ml           | 295±40  | 528±48   | 607±145*¥      | 425±54   | 623±60   | 739±48*¥  | 289±20   | 609±57¥  | 592±38¥        |
| von Willebrand<br>factor ng/ml                             | 290±55  | 446±43*  | 522±86*        | 374±30   | 584±54*  | 743±47*   | 414±43   | 525±65*¥ | 774±76*¥       |

Data are mean ± SEM. \*P<0.05 vs LC young, \*p<0.05 vs day 0, ¥p<0.05 PUFA aging vs LC young or LC aging at respective time point by ANOVA.
